# Supplementary material for: Determination and Quantification of Acetaldehyde, Acetone and Methanol in Hand Sanitizes Using Headspace GC-MS: Effect of Storage Time and Temperature
Source: Preprints.org preprint supplement (doi:10.20944/preprints202311.0573.v1), 2023-11-09
Supplement: Supplementary file 1 [file supplementary]

***Supplementary* Information**

**Determination and quantification of acetaldehyde, acetone and methanol in Hand sanitizes using Headspace GC-MS: Effect of storage time and temperature.**

Chessa To and Jacob A. Theruvathu*

Table S1: GC-MS analysis of active ingredients and impurities possibly found in commercial hand sanitizers.

| **Compound** | **Retention time (min)** | **Maor ion (m/z)** | **Other ions (m/z)** |
| --- | --- | --- | --- |
| **Methanol** | 4.66 | 31 | 32 |
| **Methanol-d4** | 4.581 | 33 | 34, 35 |
| **Ethanol** | 5.358 | 31 | 45, 46, 43 |
| **Ethanol-d6** | 5.246 | 33 | 49, 51, 34 |
| **Isopropanol** | 5.262 | 45 | 43, 41, 39 |
| **Isopropanol-d8** | 5.132 | 49 | 46, 50 |
| **N-propanol** | 7.220 | 31 | 59, 42, 60 |
| **Acetaldehyde** | 2.197 | 44 | 43, 42, 45 |
| **Acetaldehyde-d4** | 2.197 | 48 | 46, 44 |

*Main ion fragments account for 100% in relative abundance. Other ion fragments were arranged in descending relative abundance.
